# Supplementary material for: Characterization of the Immune Response to PD-1 Blockade during Chemoradiotherapy for Head and Neck Squamous Cell Carcinoma
Source: MDPI journal article supplement (doi:10.3390/cancers14102499), 2022-05-19
Supplement: s1 [file s1]

**Table S1.** Antibodies used for 3 panel stain to identify immune cell subsets in murine tumor samples. Panel 1: CD4+ T cells, CD8+ T cells, Treg and Immune checkpoint proteins; Panel 2: MDSC-like. Intracellular antibodies are underlined, and clones and company are listed under each antibody.

| Fluorochrome                | Panel 1                         | Panel 2                      |
|-----------------------------|---------------------------------|------------------------------|
| <b>Blue Dead Cell Stain</b> | Live/dead<br>Invitrogen         | Live/dead<br>Invitrogen      |
| <b>BV510</b>                | CD3 (17A2<br>Biolegend)         | CD3 (17A2<br>Biolegend)      |
| <b>BV605</b>                | CD4 (RM4-5<br>Biolegend)        | -                            |
| <b>APC-Cy7</b>              | CD8 (53-6.7<br>Biolegend)       | -                            |
| <b>PE</b>                   | <u>FOXP3 (3G3<br/>Thermo)</u>   | -                            |
| <b>APC</b>                  | <u>Ki67 (SolA15<br/>Thermo)</u> | MHCII (M5<br>eBioscience)    |
| <b>AF488</b>                | CD45 (104<br>Biolegend)         | CD45 (104<br>Biolegend)      |
| <b>BV711</b>                | PD-1 (29F.1A12<br>Biolegend)    | -                            |
| <b>BV421</b>                | LAG-3 (C9B7W<br>Biolegend)      | -                            |
| <b>PerCP/Cy5.5</b>          | TIM-3 (B8.2C12<br>Biolegend)    | Ly-6C (HK1.4<br>Biolegend)   |
| <b>PE</b>                   | -                               | CD11b (M1/70<br>eBioscience) |
| <b>AF700</b>                | -                               | Ly-6G (1A8<br>Biolegend)     |

FoxP3, forkhead box P3; MHCII, major histocompatibility complex II; MDSC, myeloid derived suppressor cells; PD1, programmed cell death 1; TIM3, T cell immunoglobulin and mucin domain 3; LAG3, Lymphocyte-activation gene 3; Treg, regulatory T cells.

**Table S2.** Antibodies used for 3 panel stain to identify peripheral immune cell subsets. Panel 1: Immune checkpoint proteins; Panel 2: CD4+ T cells, CD8+ T cells and Treg; Panel 3: B cells and MDSC-like. Intracellular antibodies are underlined, and clones and company are listed under each antibody.

| Fluorochrome                | Panel 1                       | Panel 2                           | Panel 3                    |
|-----------------------------|-------------------------------|-----------------------------------|----------------------------|
| <b>Blue Dead Cell Stain</b> | Live/dead<br>Invitrogen       | Live/dead<br>Invitrogen           | Live/dead<br>Invitrogen    |
| <b>PerCP/CY5.5</b>          | CD3 (UCHT1<br>Biolegend)      | CD3 (UCHT1<br>Biolegend)          | CD3 (UCHT1<br>Biolegend)   |
| <b>BV605</b>                | CD4<br>(RPA-T4 BD)            | CD4<br>(RPA-T4 BD)                | -                          |
| <b>APC-Cy7</b>              | CD8<br>(SK1 BD)               | CD8<br>(SK1 BD)                   | -                          |
| <b>PE-CY7</b>               | CCR7 (G043H7<br>Biolegend)    | -                                 | HLA DR (C243<br>Biolegend) |
| <b>BV421</b>                | CD45RA (HI100<br>Biolegend)   | CD45RA (HI100<br>Biolegend)       | CD33<br>(WM53 BD)          |
| <b>FITC</b>                 | PD-1 (EH12.2 H7<br>Biolegend) | CD127<br>(eBioRDR5)               | CD15 (HI98<br>Biolegend)   |
| <b>PE</b>                   | TIM-3<br>(CD366 BD)           | CD25 (M-A251<br>Biolegend)        | -                          |
| <b>A647</b>                 | LAG-3<br>(CD223 BD)           | <u>FOXP3 (206D<br/>Biolegend)</u> | -                          |
| <b>AF700</b>                | -                             | -                                 | CD11b<br>(ICRF44 BD)       |
| <b>BV510</b>                | -                             | -                                 | CD14 (M5E2<br>Biolegend)   |
| <b>BV737</b>                | -                             | -                                 | CD19<br>(SJ25C1 BD)        |

FoxP3, forkhead box P3; HLA, human leukocyte antigen; M-MDSC, monocytic myeloid derived suppressor cells; PD-1, programmed cell death 1; TIM3, T cell immunoglobulin and mucin domain 3; LAG3, Lymphocyte-activation gene 3; Treg, regulatory T cells.

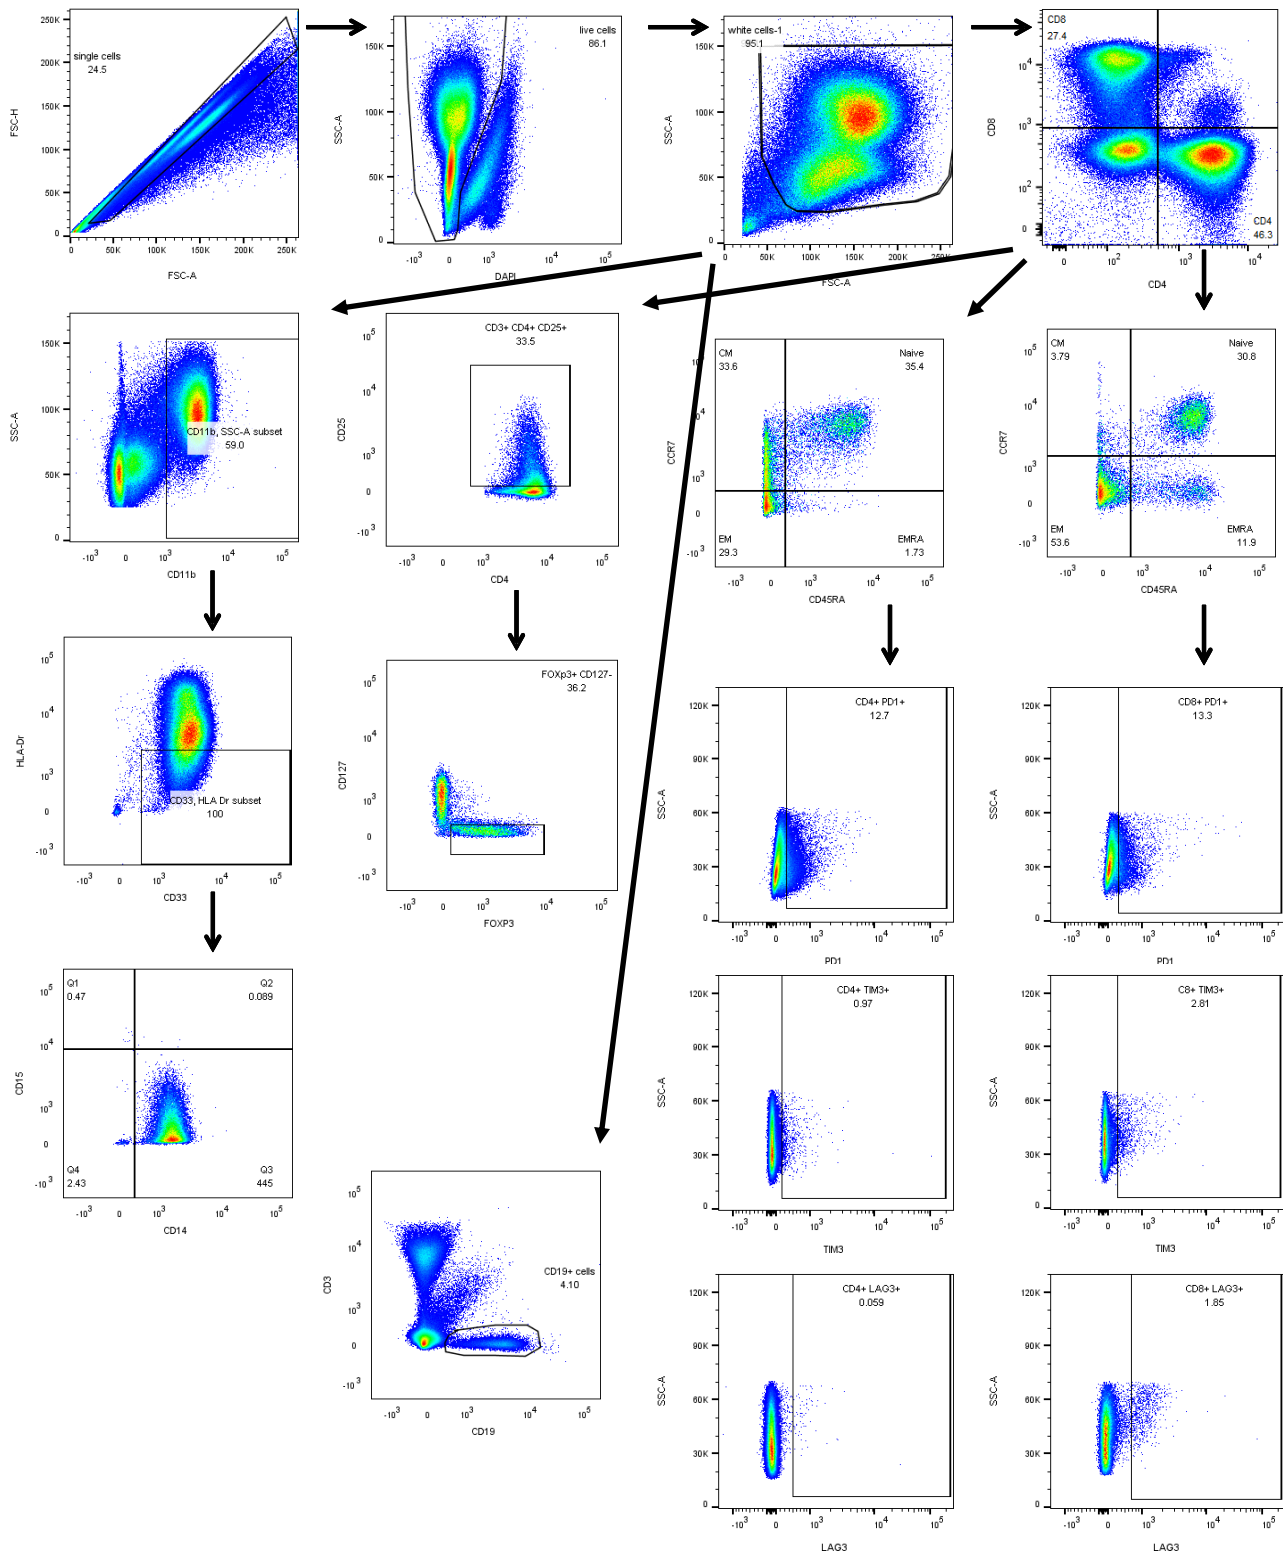

**Figure S1.** Gating strategy to identify immune cell subsets. Three immune flow cytometry panels using PBMC from a cancer patients were used. Classic immune cell types included CD4+ T cells, CD8+ T cells, Treg, B cells, and myeloid derived suppressor-like cells (MDSC-like).

**Supplementary Methods S1: Sample size and statistical analysis for animal experiments.**

Sample size estimates were calculated using a one-sided, two-arm binomial test with a power of 0.80 and type I error of 0.05. For monotherapy (control versus anti-PD-1) studies, sample size analysis was based on prior data demonstrating death (due to disease or meeting sacrifice criteria) of nearly all animals by 30 days with no treatment. To minimize animal use, due to low anticipated survival rates (null hypothesis <5% surviving at day 30) with control treatment, we hypothesized that if 50% or more animals were alive at day 30, then the anti-PD-1 treatment would be considered efficacious. As a result, a sample size of 10 for each group was needed to reject the null hypothesis. For combination therapy (chemoradiation plus IgG1 isotype control versus chemoradiation plus anti-PD-1), prior data indicate that survival at 100 days with control treatment (chemoradiation) is approximately 10% (null hypothesis) when treatment is initiated at 12 days post tumor implantation. With the addition of anti-PD-1 therapy to this treatment, we hypothesized that an improvement to 50% or more surviving is worthy of future study. This allowed for a sample size  $n = 15$  in each treatment group to reject the null hypothesis.
